# Supplementary material for: Facile synthesis of mesoporous hierarchical Co3O4–TiO2 p–n heterojunctions with greatly enhanced gas sensing performance
Source: Royal Society of Chemistry journal article supplement (doi:10.1039/c6ta11208k), 2017-01-01
Supplement: c6ta11208k1.pdf [file c6ta11208k1.pdf]

## Supporting Information for

### **Facile synthesis of mesoporous hierarchical $\text{Co}_3\text{O}_4\text{-TiO}_2$ p-n heterojunctions with enhanced gas sensing performance**

Jiajun Zhang,<sup>a</sup> Pinggui Tang,<sup>\*,a,b,c</sup> Tongyuan Liu,<sup>a</sup> Yongjun Feng,<sup>a</sup> Chris Blackman,<sup>c</sup>  
and Dianqing Li<sup>\*,a,b</sup>

<sup>a</sup> State Key Laboratory of Chemical Resource Engineering, Beijing University of  
Chemical Technology, Beijing 100029, P.R. China.

<sup>b</sup> Beijing Engineering Center for Hierarchical Catalysts, Beijing University of  
Chemical Technology, Beijing 100029, P.R. China.

<sup>c</sup> Department of Chemistry, University College London, 20 Gordon Street, WC1H0AJ  
London, UK.

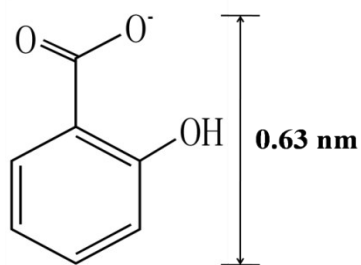

**Fig. S1** Molecular structure of salicylic anion.

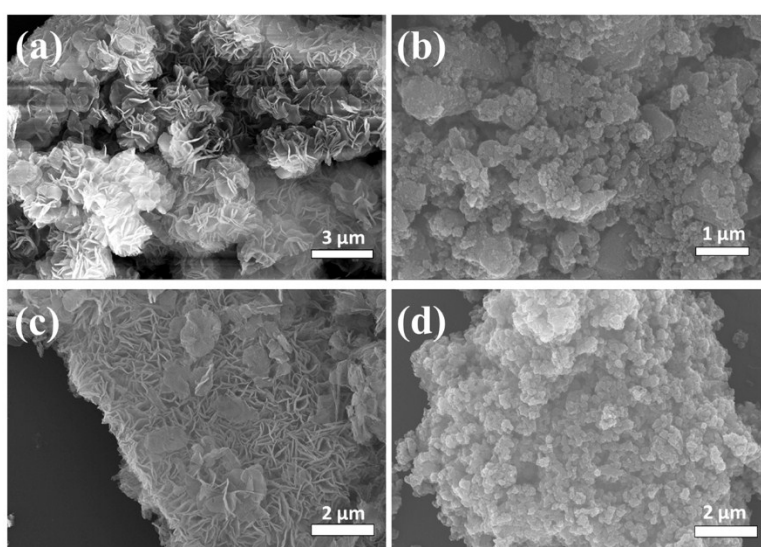

**Fig. S2** SEM image (a) pure Co-LH, (b) Ti-LH, (c) pure  $\text{Co}_3\text{O}_4$ -350, and (d) pure  $\text{TiO}_2$ -350.

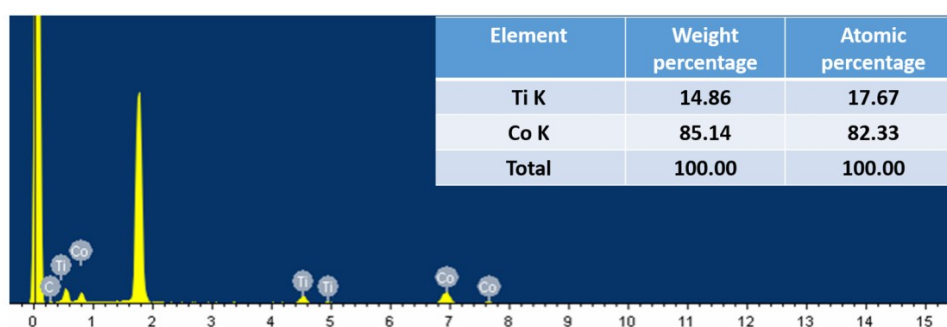

**Fig. S3** The EDX spectra and atomic percentage of  $\text{CoTiO-4-350}$ .

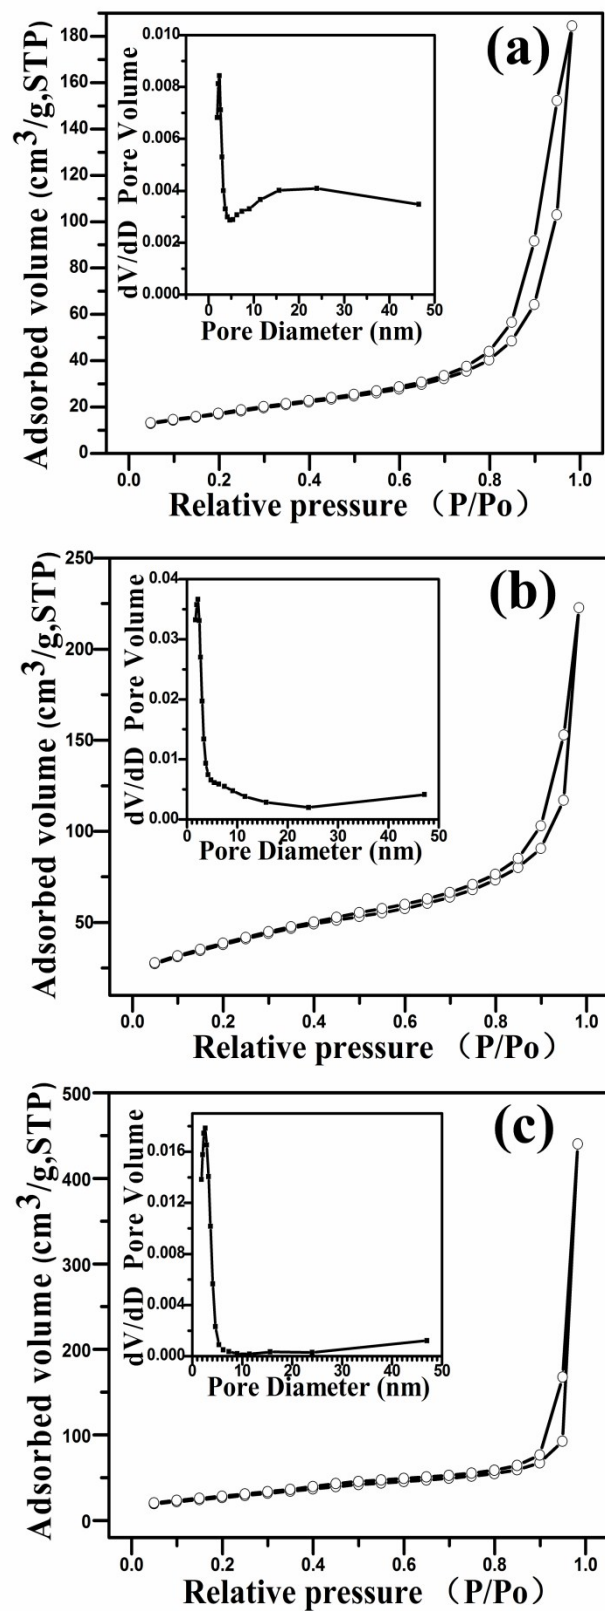

**Fig. S4** Nitrogen adsorption-desorption isotherms and pore size distribution of (a) Co<sub>3</sub>O<sub>4</sub>-350, (b)

CoTiO-4-300, and (c) CoTiO-4-400.

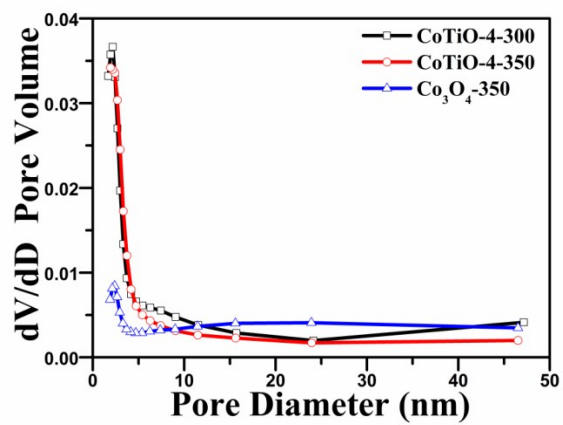

Fig. S5 The pore size distribution of Co<sub>3</sub>O<sub>4</sub>-350, CoTiO-4-300 and CoTiO-4-350.

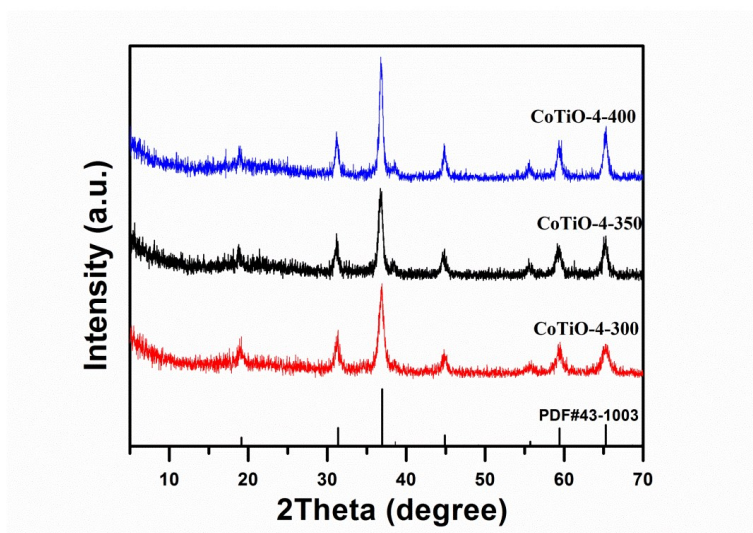

Fig. S6 XRD pattern of CoTiO-4-300, CoTiO-4-350 and CoTiO-4-400.

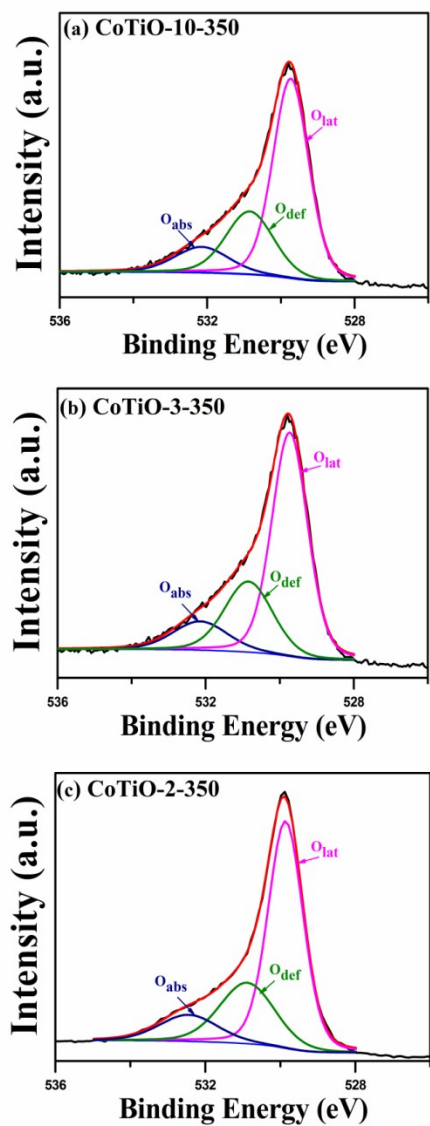

**Fig. S7** The O 1s XPS spectra of CoTiO-10-350, CoTiO-3-350 and CoTiO-2-350.

**Table S1** The relative percentage (%) of O 1s peaks for samples

|                | $O_{abs}$ | $O_{def}$ | $O_{lat}$ |
|----------------|-----------|-----------|-----------|
| $Co_3O_4$ -350 | 11.4      | 26.6      | 62.0      |
| CoTiO-10-350   | 11.9      | 26.5      | 61.6      |
| CoTiO-4-350    | 13.0      | 25.7      | 61.3      |
| CoTiO-3-350    | 12.4      | 26.0      | 61.6      |
| CoTiO-2-350    | 12.1      | 26.4      | 61.5      |

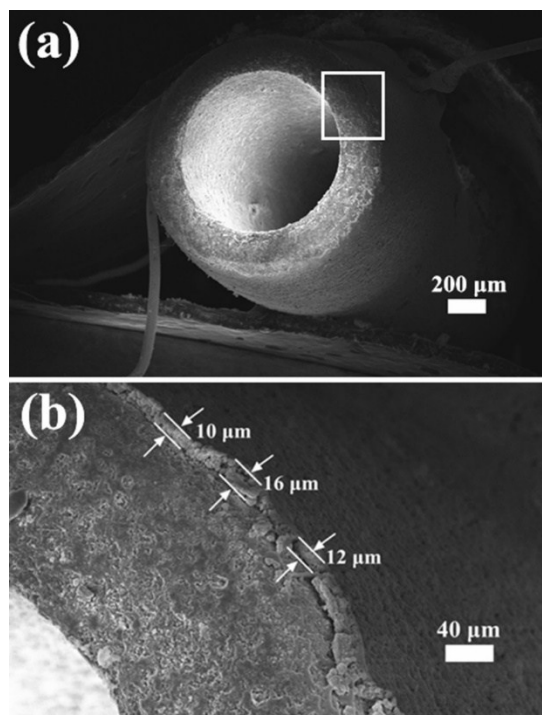

Fig. S8 Cross-section view images of the gas sensor.

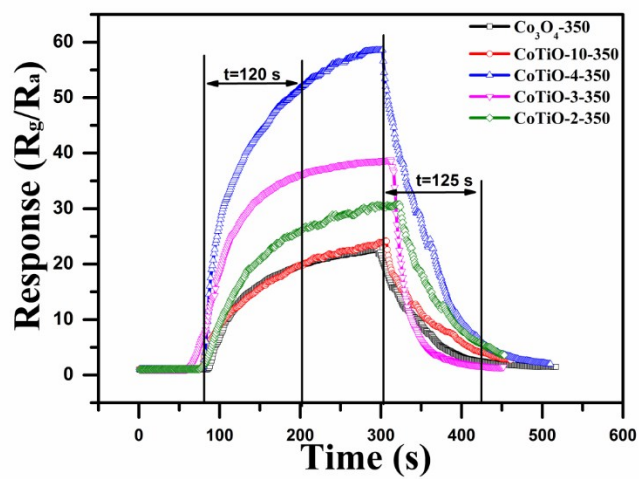

Fig. S9 Typical response and recovery curve of  $\text{Co}_3\text{O}_4$ -350,  $\text{CoTiO}$ -10-350,  $\text{CoTiO}$ -4-350,  $\text{CoTiO}$ -3-350 and  $\text{CoTiO}$ -2-350 to 50 ppm toluene at 115°C.

**Table S2** Response values of sensors to 50 ppm xylene at different operating temperatures

| Temperature | Co <sub>3</sub> O <sub>4</sub> -350 | CoTiO-10-350 | CoTiO-4-350 | CoTiO-3-350 | CoTiO-2-350 | TiO <sub>2</sub> -350 |
|-------------|-------------------------------------|--------------|-------------|-------------|-------------|-----------------------|
| 60          | 3                                   | 10           | 3           | 7           | 4           | 1                     |
| 77          | 18                                  | 35           | 32          | 27          | 24.5        | 1                     |
| 95          | 43                                  | 63           | 45          | 42          | 25.5        | 1                     |
| 105         | 35                                  | 53           | 130         | 77          | 48          | 1                     |
| 115         | 32                                  | 48           | 113         | 81          | 80          | 1                     |
| 125         | 21.5                                | 35           | 63          | 62          | 58          | 1                     |
| 135         | 4                                   | 4            | 22          | 12          | 5           | 1                     |

**Table S3** The resistance of pure Co<sub>3</sub>O<sub>4</sub>-350 and CoTiO-4-350 in air and 50 ppm xylene at different temperatures (Resistance unit, k $\Omega$ )

| Temperature | R <sub>a</sub> (Co <sub>3</sub> O <sub>4</sub> -350) | R <sub>g</sub> (Co <sub>3</sub> O <sub>4</sub> -350) | R <sub>a</sub> (CoTiO-350) | R <sub>g</sub> (CoTiO-350) |
|-------------|------------------------------------------------------|------------------------------------------------------|----------------------------|----------------------------|
| 77          | 341.6                                                | 6148.7                                               | 374.6                      | 16859.0                    |
| 95          | 41.1                                                 | 1766.9                                               | 28.5                       | 3308.1                     |
| 115         | 16.9                                                 | 540.4                                                | 10.8                       | 1142.9                     |
| 135         | 9.7                                                  | 209.3                                                | 5.8                        | 255.2                      |
| 155         | 1.9                                                  | 7.7                                                  | 2.0                        | 4.7                        |
